# Supplementary material
Source: HighWire-hosted journal article supplement (http://ajnr-stage2.highwire.org/highwire/filestream/95297/field_highwire_adjunct_files/0/0489.pdf)

**Supplementary Table 1. MRI Acquisition Protocol**

| <b>Pulse sequence</b>  |                         |
|------------------------|-------------------------|
| CE-T1WI                |                         |
| Repetition time (ms)   | 9.8                     |
| Echo time (ms)         | 4.6                     |
| Pixel size (mm)        | 0.5                     |
| Section thickness (mm) | 1                       |
| FLAIR                  |                         |
| Repetition time (ms)   | 9250 ± 433 (9000–10000) |
| Echo time (ms)         | 128.8 ± 4.8 (125–135)   |
| Pixel size (mm)        | 0.76 ± 0.14 (0.65–0.94) |
| Section thickness (mm) | 4.5 ± 0.3 (4–5)         |

Note: CE-T1WI = contrast-enhanced T1-weighted imaging, FLAIR = fluid attenuated inversion recovery.

**Supplementary Table 2.** Variable importance of the clinical predictors, conventional imaging findings, and tumor habitats using random survival forest analysis.

| Variable                          | Importance |
|-----------------------------------|------------|
| Atypical finding                  | 0.0185     |
| Hypovascular cellular habitat     | 0.0049     |
| Age                               | 0.0037     |
| Hypovascular hypocellular habitat | 0.002      |
| Deep location                     | −0.0005    |
| ECOG                              | −0.0009    |
| CSF-total protein                 | −0.0028    |
| Hypervascular cellular habitat    | −0.0040    |
| Serum LDH level                   | −0.0148    |

### **Preprocessing and parameters of the DWI and DSC imaging**

The DWI parameters were as follows: repetition time (TR)/echo time (TE), 3000/56 ms; diffusion gradient encoding,  $b = 0$  and  $1000 \text{ mm}^2/\text{s}$ ; field of view (FOV),  $250 \times 250 \text{ mm}$ ; matrix,  $256 \times 256$ ; and slice thickness/gap,  $5/2 \text{ mm}$ . ADC images were calculated from  $b = 1000$  and  $b = 0 \text{ mm}^2/\text{s}$  DWI images.

DSC perfusion imaging and three-dimensional (3D) CE-T1-weighted imaging were performed after contrast injection. DSC imaging was acquired using a gradient-echo echo-planar imaging protocol. A preload of  $0.01 \text{ mmol/kg}$  gadoterate meglumine (Dotarem; Guerbet) was administered, followed by a dynamic bolus of a standard dose of  $0.1 \text{ mmol/kg}$  gadoterate meglumine delivered at a rate of  $4 \text{ mL/s}$  by an MRI-compatible power injector (Spectris; Medrad). The contrast material bolus was followed by a  $20 \text{ mL}$  saline injection delivered at the same rate. The DSC imaging parameters included the following: TR/TE,  $1808/40 \text{ ms}$ ; flip angle,  $35^\circ$ ; FOV,  $24 \times 24 \text{ cm}$ ; slice thickness/gap,  $5/2 \text{ mm}$ ; matrix,  $128 \times 128$ ; total acquisition time,  $1 \text{ min}$  and  $54 \text{ s}$ . The dynamic acquisition was performed with a temporal resolution of  $1.5 \text{ s}$  and  $60$  dynamics were acquired. DSC imaging was acquired with complete tumor volume coverage and the same section orientation as that used for conventional MRI. The parameters of the CE-T1-weighted imaging included: TR/TE,  $10/5 \text{ ms}$ ; flip angle,  $10^\circ$ ; FOV,  $256 \text{ mm}$ ; matrix,  $256 \times 256$ ; and slab thickness,  $18 \text{ mm}$ .

### Supplementary Figure.

Atypical features (necrosis or hemorrhage component) of primary central nervous system lymphoma on conventional MRI. **A.** The left basal ganglia demonstrates an irregular-shaped peripheral enhancing lesion with inner non-enhancing tumor necrosis. There is abundant perilesional edema. **B.** A mass in the left temporo-occipital lobe demonstrates a peripheral irregular enhancing wall and inner hemorrhage, with hemosiderin deposition, T1 signal intensity, and high attenuation on CT being notable. There is abundant perilesional edema.

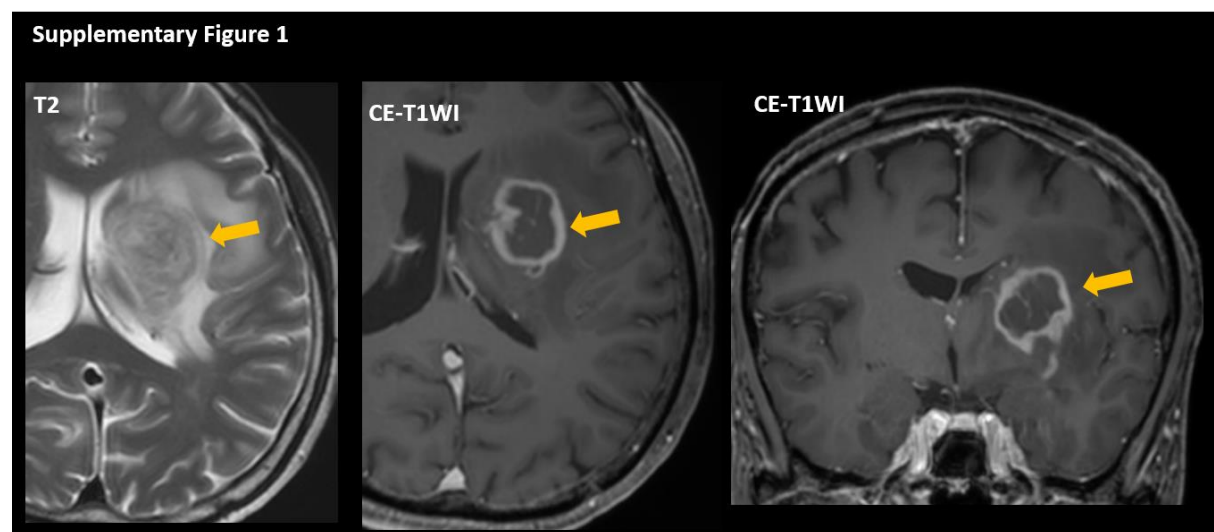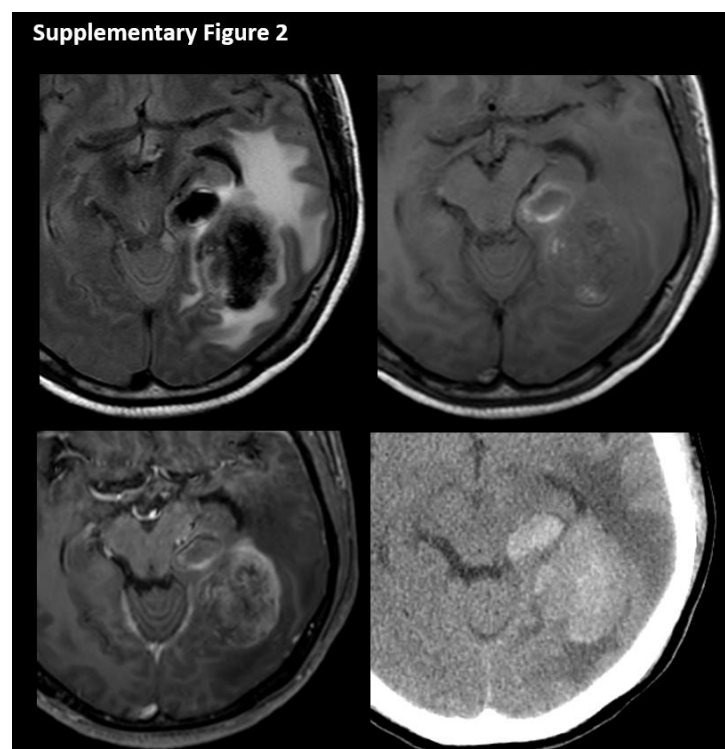

Supplement: 0489.pdf [file 0489.pdf]
